# Supplementary material for: Genetic and Chemical Controls of Sperm Fate and Spermatocyte Dedifferentiation in <em>Caenorhabditis elegans</em>
Source: Preprints.org preprint supplement (doi:10.20944/preprints202212.0391.v1), 2022-12-21
Supplement: Supplementary file 1 [file supplementary]

Supplementary Information for

**Genetic and Chemical Controls of Sperm Fate and Spermatocyte Dedifferentiation in  
*Caenorhabditis elegans***

Youngyong Park<sup>1,4</sup>, Matthew Gaddy<sup>1,4</sup>, Moonjung Hyun<sup>2</sup>, Mariah E. Jones<sup>1</sup>, Hafiz M. Aslam<sup>1</sup>,  
Myon Hee Lee<sup>1,3,5</sup>

<sup>1</sup>Division of Hematology/Oncology, Department of Internal Medicine, Brody School of  
Medicine at East Carolina University, Greenville, NC 27834, USA

<sup>2</sup>Biological Resources Research Group, Bioenvironmental Science & Toxicology Division, Korea  
Institute of Toxicology, Gyeongsangnam-do, 52834, South Korea

<sup>3</sup>Department of Biology, East Carolina University, NC 27858, USA

<sup>4</sup>These authors contributed to this work

**Table S1. *C. elegans* strains used in this study**

| <b>Strain</b> | <b>Genotype</b>                                                                       | <b>Citation</b> |
|---------------|---------------------------------------------------------------------------------------|-----------------|
| N2            | <i>wild-type (Bristol strain)</i>                                                     | [1]             |
| JK3231        | <i>puf-8(q725)</i>                                                                    | [34]            |
| AH102         | <i>lip-1(zh15)</i>                                                                    | [68]            |
| JK3961        | <i>puf-8(q725)/mln[mls14 dpy-10(e128)]; lip-1(zh15)</i>                               | [23]            |
| SD939         | <i>mpk-1(ga111) unc-79(e1068)</i>                                                     | [31, 43]        |
| JK3997        | <i>puf-8(q725)/mln[mls14 dpy-10(e128)]; lip-1(zh15); mpk-1(ga111) unc-79(e1068)</i>   | [23]            |
| JK816         | <i>fem-3(q20) gain-of-function</i>                                                    | [35]            |
| MHL58         | <i>puf-8(q725)/mln[mls14 dpy-10(e128)]; fem-3(q20gf)</i>                              | This study      |
| DG3913        | <i>tn1541[GFP::tev::s::lin-41]</i>                                                    | [37]            |
| MHL106        | <i>puf-8(q725)/mln[mls14 dpy-10(e128)]; fem-3(q20gf); tn1541[GFP::tev::s::lin-41]</i> | This study      |

**Table S2. Antibodies used in this study**

| <b>Antibody against</b>            | <b>Resource</b>             |
|------------------------------------|-----------------------------|
| MSP (a marker for sperm fate)      | DSHB (Cat#: 4A5)            |
| HIM-3 (a marker for meiotic cells) | NOVUS (Cat#: 53470002)      |
| GFP (Green Fluorescent Protein)    | Abcam (Cat#: Ab290)         |
| pERK1/2                            | Cell Signaling (Cat#: 9101) |
| ERK1/2                             | Cell Signaling (Cat#: 9102) |
| Tubulin                            | Sigma Aldrich (Cat#: T8203) |

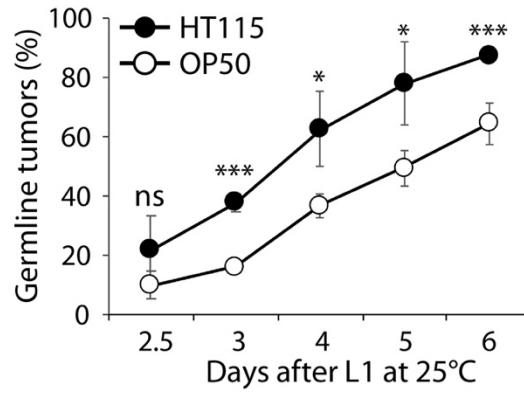

**Figure S1. The effect of bacterial foods on spermatocyte dedifferentiation-mediated tumorigenesis in *puf-8(q725); fem-3(q20gf)* mutants at 25°C.** The *puf-8(q725); fem-3(q20gf)* mutants fed HT115 *E. coli* had significantly more germline tumors than those fed OP50 *E. coli*. \*\*\*,  $p < 0.001$ ; \*\*,  $p < 0.01$ ; \*,  $p < 0.05$ ; ns, not statistically significant.
